# Supplementary material for: A Big World Inside Small-World Networks
Source: PubMed Central journal article supplement (PMC2682646; doi:10.1371/journal.pone.0005686), 2009-05-25
Supplement: pone.0005686.s001.pdf [file pone.0005686.s001.pdf]

Table S1. Clustering coefficients of 13 real networks.

| Networks                       | # of nodes | Clustering coefficients |          |              |         |                   | Clustering coefficient and diameter |                   |
|--------------------------------|------------|-------------------------|----------|--------------|---------|-------------------|-------------------------------------|-------------------|
|                                |            | Observed                | Expected | % difference | Z-score | P-value           | Correlation <sup>1</sup>            | P-value           |
| Characters in "Les Miserables" | 77         | 0.37                    | 0.33     | 10.7         | 3.42    | 0.0006            | 0.02                                | 0.6226            |
| Words in "David Copperfield"   | 112        | 0.09                    | 0.09     | 1.6          | 0.15    | 0.8771            | -0.09                               | 0.0380            |
| Dolphins                       | 62         | 0.15                    | 0.15     | -2.4         | -0.25   | 0.8026            | 0.23                                | <10 <sup>-4</sup> |
| Political blogs                | 1224       | 0.18                    | 0.1584   | 13.6         | 3.64    | 0.0003            | -0.06                               | 0.3259            |
| Co-authorship                  | 7610       | 0.44                    | 0.40     | 8.8          | 1.28    | 0.1996            | 0.03                                | 0.5623            |
| Football                       | 115        | 0.20                    | 0.19     | 8.6          | 6.15    | <10 <sup>-4</sup> | 0.53                                | <10 <sup>-4</sup> |
| Power                          | 4941       | 0.05                    | 0.05     | 6.8          | 0.64    | 0.5212            | -0.04                               | 0.3685            |
| Airline                        | 810        | 0.34                    | 0.22     | 57.2         | 20.95   | <10 <sup>-4</sup> | -0.42                               | <10 <sup>-4</sup> |
| Electronic circuits            | 512        | 0.03                    | 0.03     | 12.8         | 0.79    | 0.4320            | 0.16                                | 0.0004            |
| Protein-protein interaction    | 1870       | 0.07                    | 0.06     | 13.5         | 2.00    | 0.0455            | -0.05                               | 0.2746            |
| Neural                         | 297        | 0.15                    | 0.11     | 41.8         | 18.92   | <10 <sup>-4</sup> | -0.04                               | 0.3410            |
| Transcriptional regulatory     | 3459       | 0.05                    | 0.05     | 8.8          | 2.44    | 0.0145            | 0.04                                | 0.0048            |
| Metabolic                      | 563        | 0.05                    | 0.04     | 15.4         | 0.96    | 0.3391            | -0.02                               | 0.6430            |

<sup>1</sup> Spearman's correlation between clustering coefficient and diameter among randomly rewired networks
