# Supplementary material for: A Big World Inside Small-World Networks
Source: PubMed Central journal article supplement (PMC2682646; doi:10.1371/journal.pone.0005686), 2009-05-25
Supplement: pone.0005686.s002.pdf [file pone.0005686.s002.pdf]

Table S2. The diameters and modularities of 13 real networks compared to the expected values in randomly rewired networks of conserved modules.

| Networks                     | # of nodes | Diameter |          |              |         |                   |                            | Modularity |          |              |         |                   |
|------------------------------|------------|----------|----------|--------------|---------|-------------------|----------------------------|------------|----------|--------------|---------|-------------------|
|                              |            | Observed | Expected | % difference | Z-score | P-value           | % explainable <sup>1</sup> | Observed   | Expected | % difference | Z-score | P-value           |
| Miserables"                  | 77         | 2.64     | 2.71     | -2.5         | -1.40   | 0.16              | 149                        | 0.56       | 0.58     | -3.45        | -2.59   | 0.0096            |
| Words in "David Copperfield" | 112        | 2.54     | 2.54     | -0.2         | -0.20   | 0.84              | 107                        | 0.31       | 0.36     | -14.80       | -4.87   | <10 <sup>-4</sup> |
| Dolphins                     | 62         | 3.36     | 3.07     | 9.3          | 4.53    | <10 <sup>-4</sup> | 56                         | 0.53       | 0.56     | -5.76        | -2.77   | 0.0056            |
| Political blogs              | 1224       | 2.74     | 2.71     | 1.0          | 4.45    | <10 <sup>-4</sup> | 81                         | 0.43       | 0.45     | -5.12        | -21.21  | <10 <sup>-4</sup> |
| Co-authorship                | 7610       | 7.03     | 5.74     | 22.4         | 97.40   | <10 <sup>-4</sup> | 20                         | 0.81       | 0.81     | 0.48         | 0.08    | 0.9362            |
| Football                     | 115        | 2.51     | 2.44     | 2.8          | 7.46    | <10 <sup>-4</sup> | 76                         | 0.60       | 0.61     | -0.89        | -2.73   | 0.0063            |
| Power                        | 4941       | 18.99    | 12.10    | 57.0         | 47.30   | <10 <sup>-4</sup> | 35                         | 0.93       | 0.91     | 2.44         | 3.43    | 0.0006            |
| Airline                      | 810        | 3.06     | 3.11     | -1.5         | -1.90   | 0.06              | 110                        | 0.31       | 0.39     | -20.80       | -3.52   | 0.0004            |
| Electronic circuits          | 512        | 6.86     | 6.51     | 5.3          | 0.52    | 0.60              | 71                         | 0.81       | 0.80     | 1.41         | 0.95    | 0.3421            |
| Protein-protein interaction  | 1870       | 6.81     | 6.09     | 11.8         | 7.79    | <10 <sup>-4</sup> | 30                         | 0.81       | 0.81     | 0.32         | -0.39   | 0.6965            |
| Neural                       | 297        | 2.46     | 2.43     | 1.0          | 1.97    | 0.05              | 76                         | 0.40       | 0.45     | -11.29       | -12.58  | <10 <sup>-4</sup> |
| Transcriptional regulatory   | 3459       | 3.72     | 3.61     | 3.0          | 9.04    | <10 <sup>-4</sup> | 67                         | 0.60       | 0.62     | -2.71        | -6.58   | <10 <sup>-4</sup> |
| Metabolic                    | 563        | 8.78     | 8.07     | 8.8          | 2.63    | 0.009             | 68                         | 0.84       | 0.84     | 0.00         | -0.35   | 0.7263            |

<sup>1</sup> (expected diameter of rewired networks with conserved modules - expected diameter of completely rewired networks)/(observed diameter-expected diameter of completely rewired networks) x 100.

% explainable is greater than 100 for three networks, possibly because of (i) stochastic error in estimating the expected diameter, (ii) imperfect design of the random rewiring with preserved modules, which produces networks with increased modularity, or (iii) presence of forces that reduce diameters under the constraint of a certain level of modularity.
