# Supplementary material for: A Big World Inside Small-World Networks
Source: PubMed Central journal article supplement (PMC2682646; doi:10.1371/journal.pone.0005686), 2009-05-25
Supplement: pone.0005686.s004.pdf [file pone.0005686.s004.pdf]

Table S4. Parameters used in each set of simulations used for generating networks for Fig. 1

| Simulations | $m$ | $M$ | $N$ | $S$          | $K$          |
|-------------|-----|-----|-----|--------------|--------------|
| Series A    | 4   | 30  | 130 | From 30 to 1 | From 1 to 30 |
| Series B    | 6   | 30  | 130 | From 30 to 1 | From 1 to 30 |
| Series C    | 8   | 30  | 130 | From 30 to 1 | From 1 to 30 |
| Series D    | 10  | 30  | 130 | From 30 to 1 | From 1 to 30 |
| Series E    | 12  | 30  | 130 | From 30 to 1 | From 1 to 30 |
