# Supplementary material for: A Big World Inside Small-World Networks
Source: PubMed Central journal article supplement (PMC2682646; doi:10.1371/journal.pone.0005686), 2009-05-25
Supplement: pone.0005686.s009.pdf [file pone.0005686.s009.pdf]

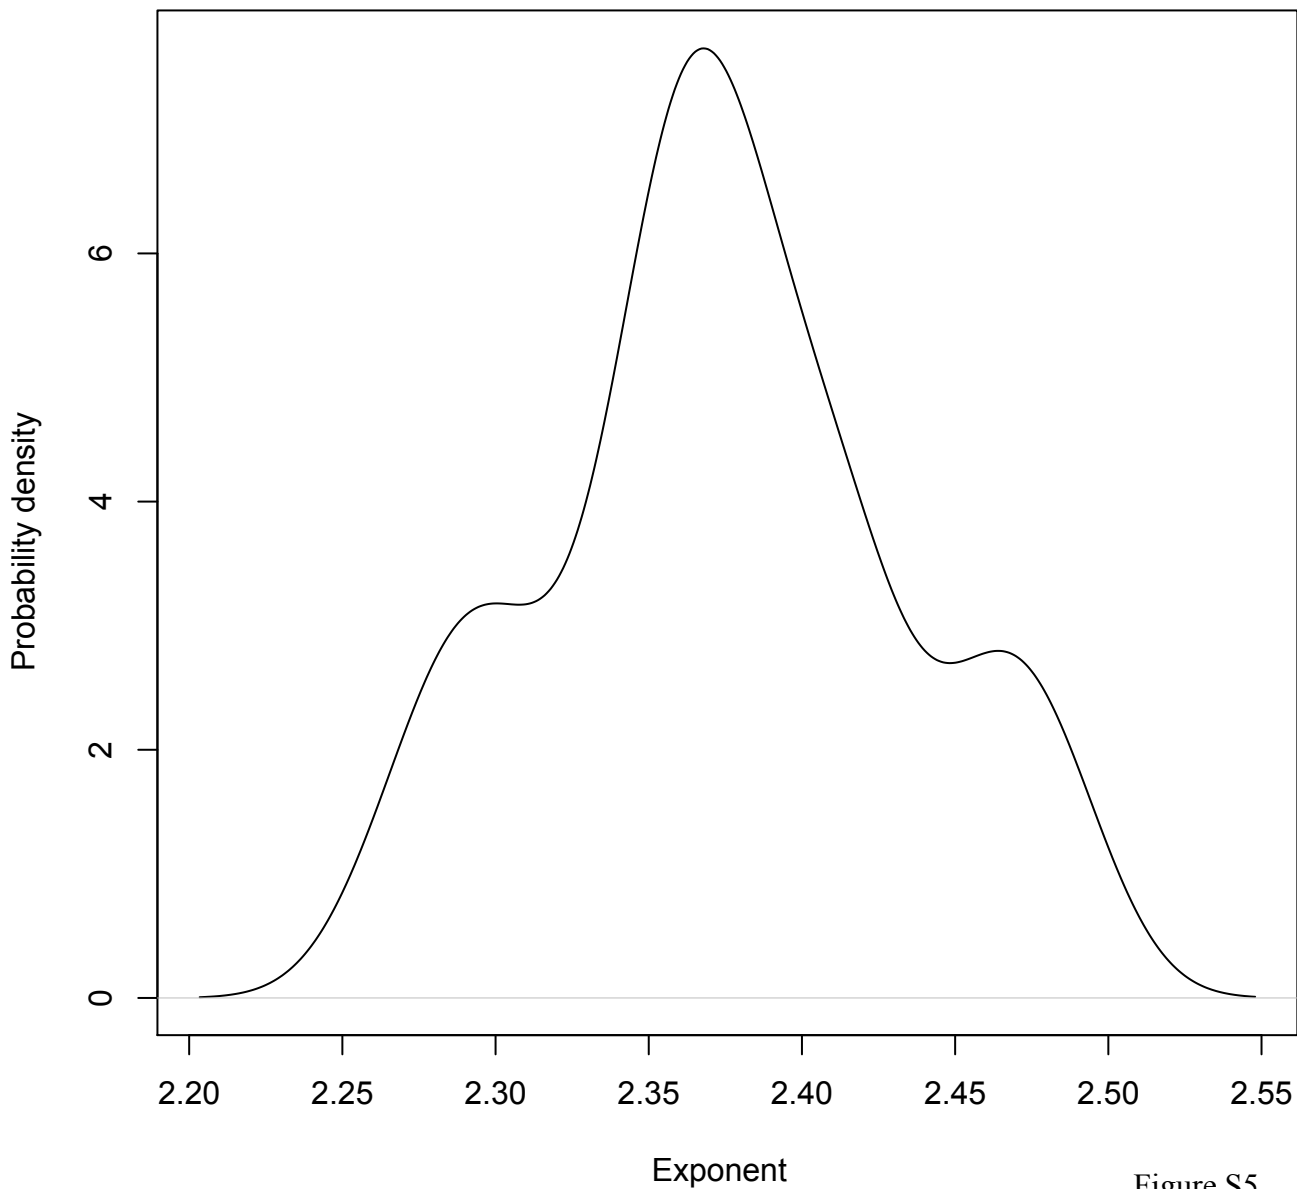

Figure S5
